# Supplementary material
Source: publisher figshare collection journal article supplement (https://sage.figshare.com/ndownloader/files/14375906)
Supplement: Supplementary file 1 [file 14375906]

## Supplemental Material

**Table 1. Two-way sensitivity analysis results: The probability that accelerated physiotherapy programme is cost-effective at a willingness to pay of £20,000 per quality adjusted life years for varying estimates of hospitalisation cost and health related quality of life.**

|                         | APP -<br>Reference<br>case | APP +25%<br>hospitalisation | APP +50%<br>hospitalisation | APP +75%<br>hospitalisation | APP +100%<br>hospitalisation |
|-------------------------|----------------------------|-----------------------------|-----------------------------|-----------------------------|------------------------------|
| APP - Reference<br>case | 1.00                       | 1.00                        | 1.00                        | 1.00                        | 1.00                         |
| APP QALY: -15%          | 0.61                       | 0.59                        | 0.57                        | 0.54                        | 0.52                         |
| APP QALY: -7.5%         | 0.97                       | 0.97                        | 0.96                        | 0.96                        | 0.95                         |
| APP QALY: 7.5%          | 1.00                       | 1.00                        | 1.00                        | 1.00                        | 1.00                         |
| APP QALY: 15%           | 1.00                       | 1.00                        | 1.00                        | 1.00                        | 1.00                         |

Acronyms: accelerated physiotherapy programme (APP), quality adjusted life years (QALY)

**Figure 1. Mean EQ-5D utility scores and 95% confidence intervals by time point and trial arm.**

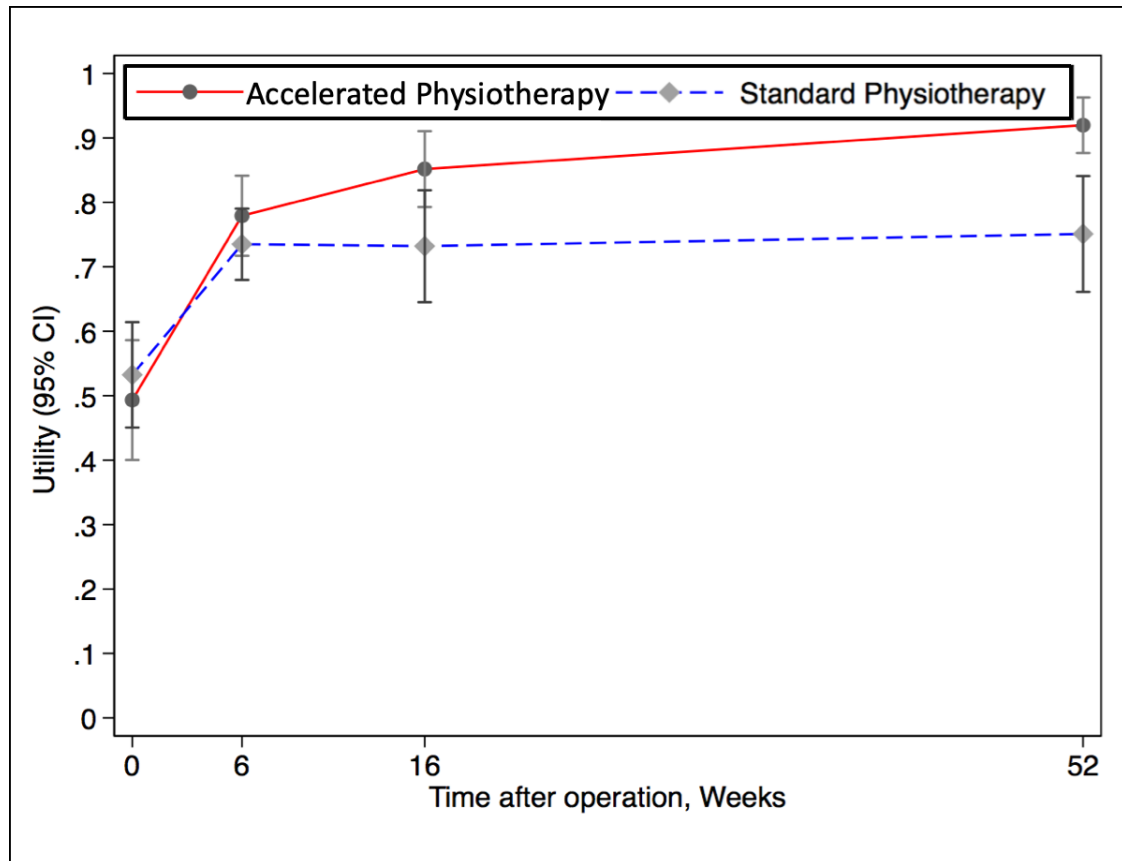

**Figure 2. Cost-effectiveness plane showing 5000 bootstrapped pairs of cost and quality adjusted life year differences**

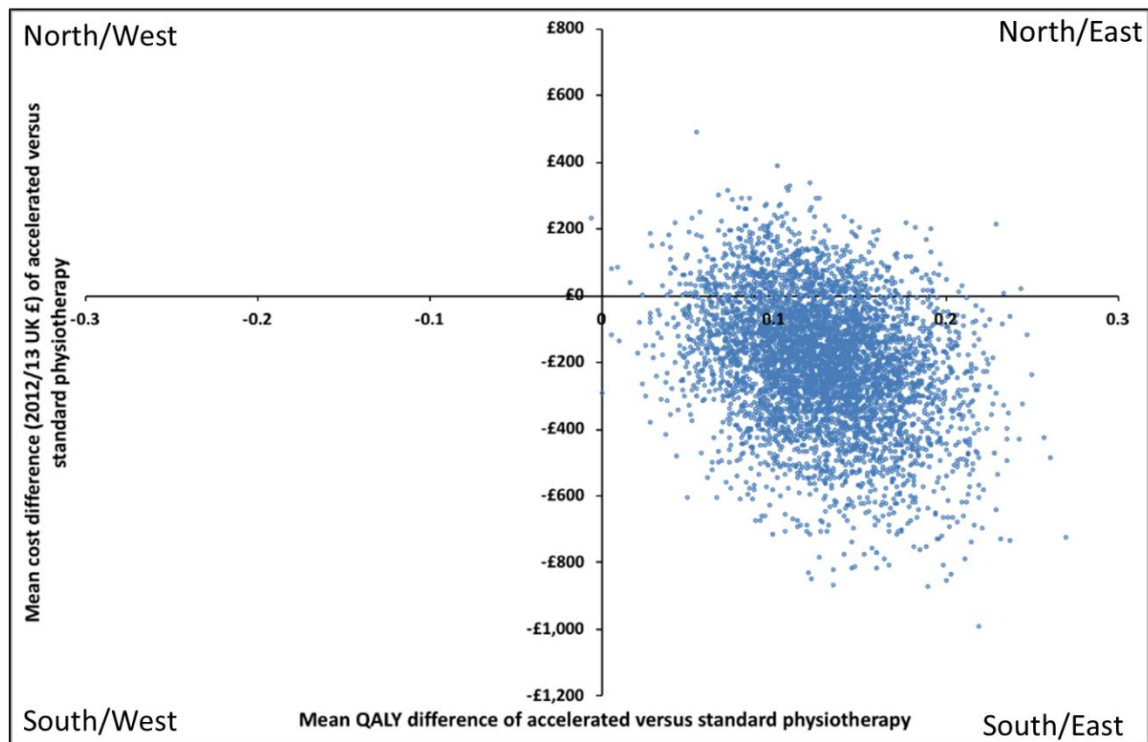

**Figure 3. Cost-effectiveness acceptability curves: reference case and one-way sensitivity analyses varying hospitalisation cost (panel a) and quality adjusted life years (panel b) observed in accelerated physiotherapy programme arm.**

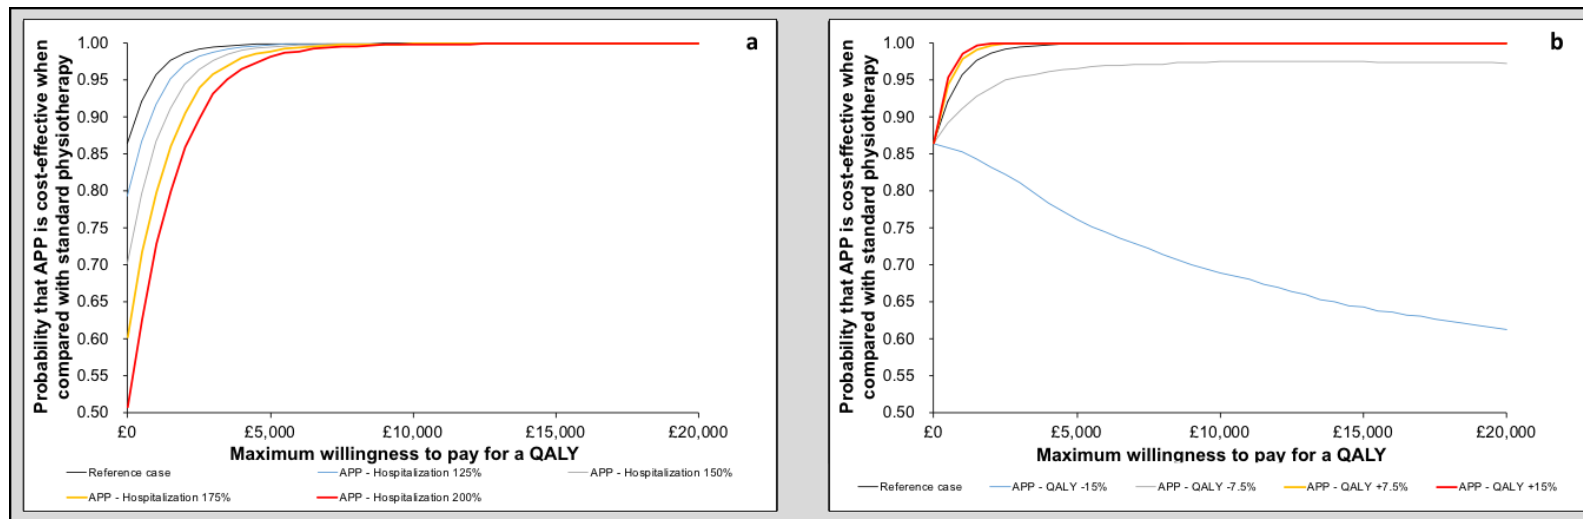

Acronyms: accelerated physiotherapy programme (APP), quality adjusted life years (QALY)
